# Supplementary material for: The Chlamydia trachomatis inclusion membrane protein CT006 associates with lipid droplets in eukaryotic cells
Source: PubMed Central journal article supplement (PMC8863265; doi:10.1371/journal.pone.0264292), 2022-02-22

1. Uncropped blot images from Fig 5a.

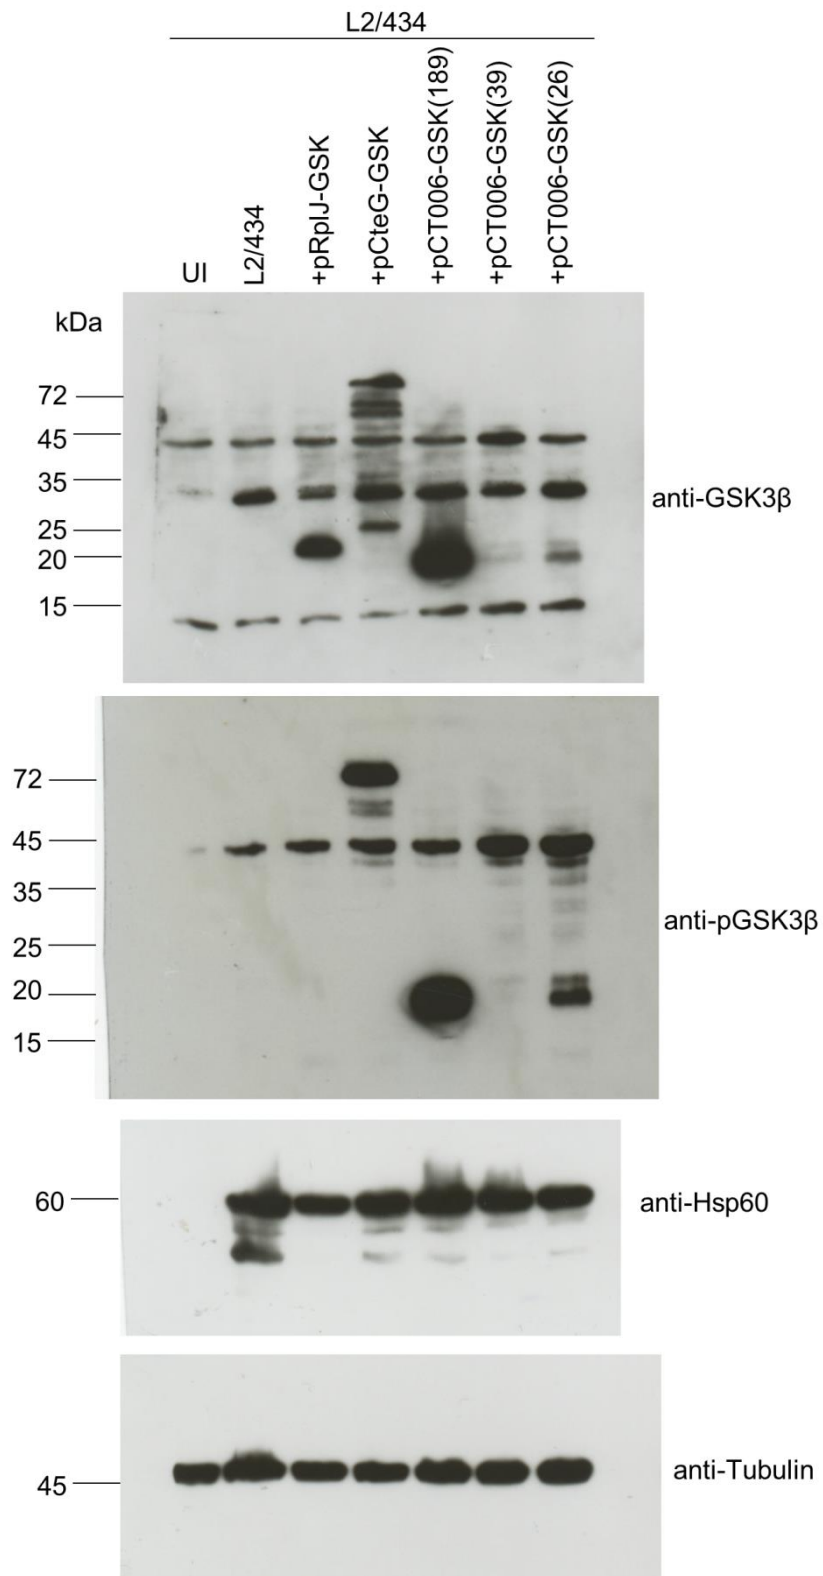

## 2. Uncropped blot images from Fig 6a.

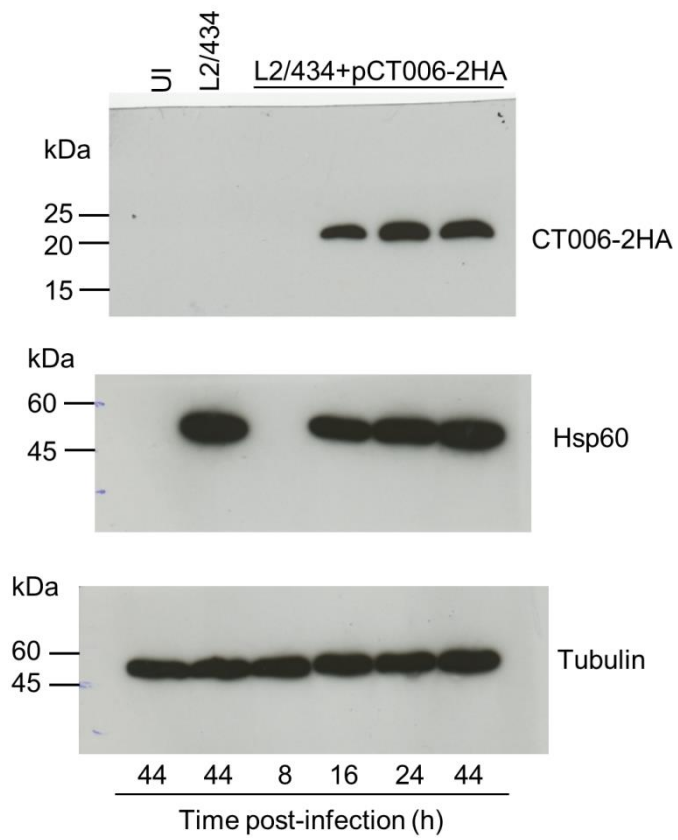

### 3. Uncropped blot images from Fig a in S1 Fig.

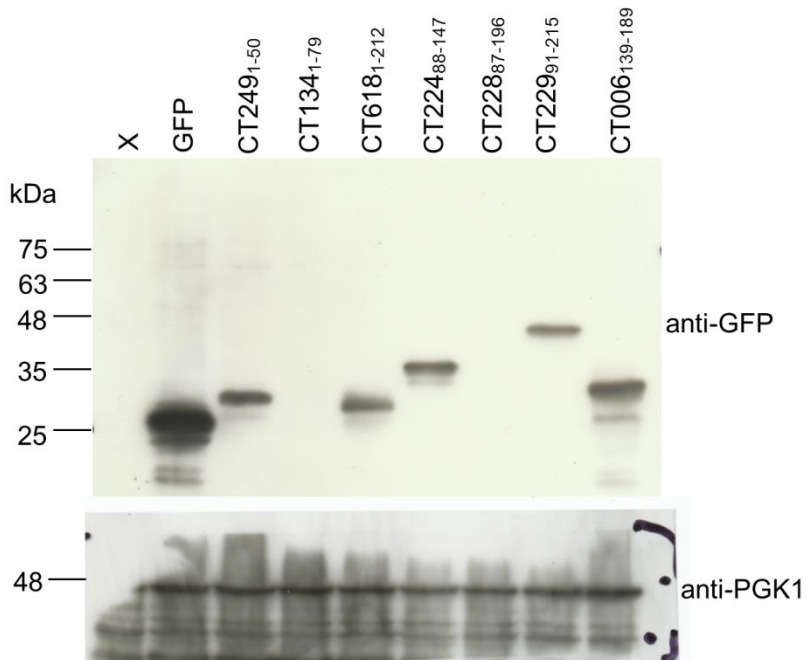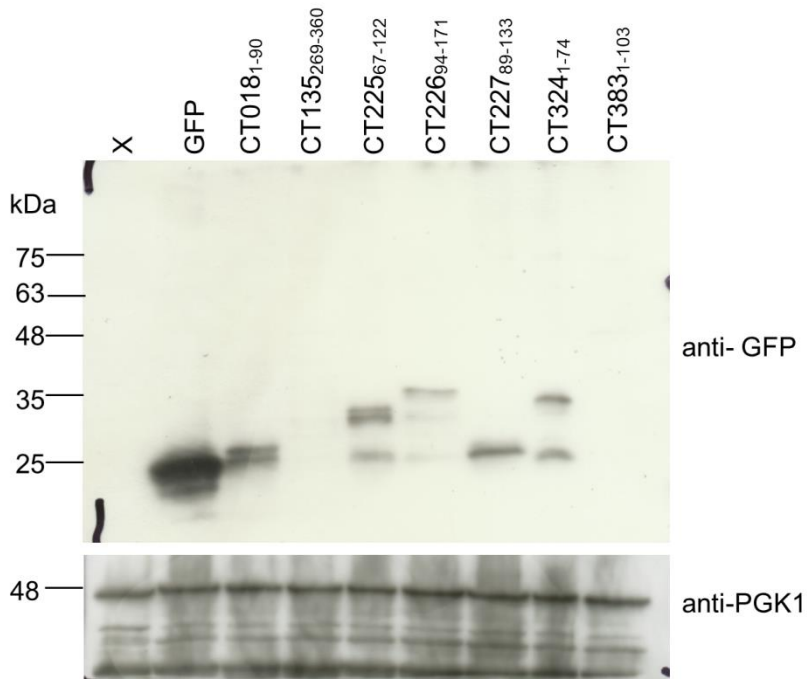

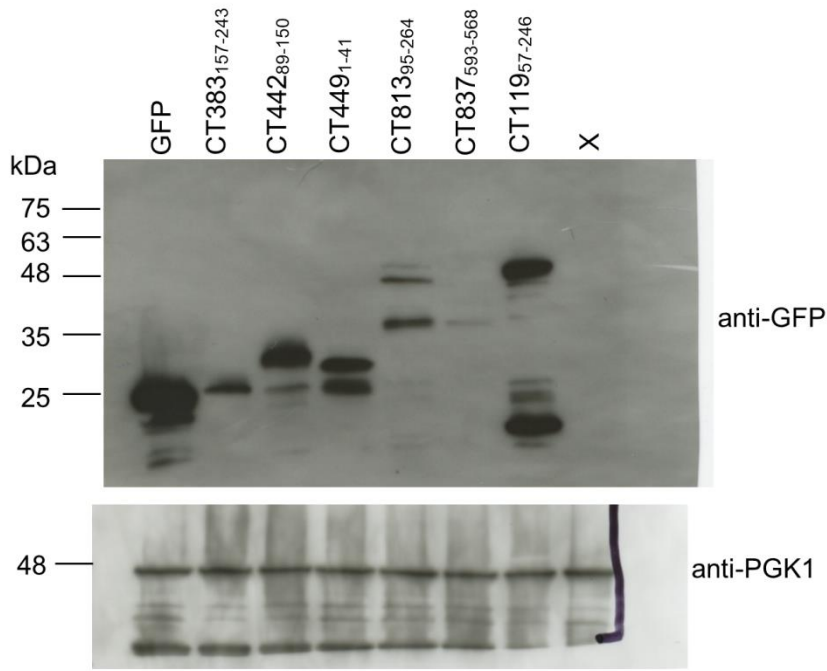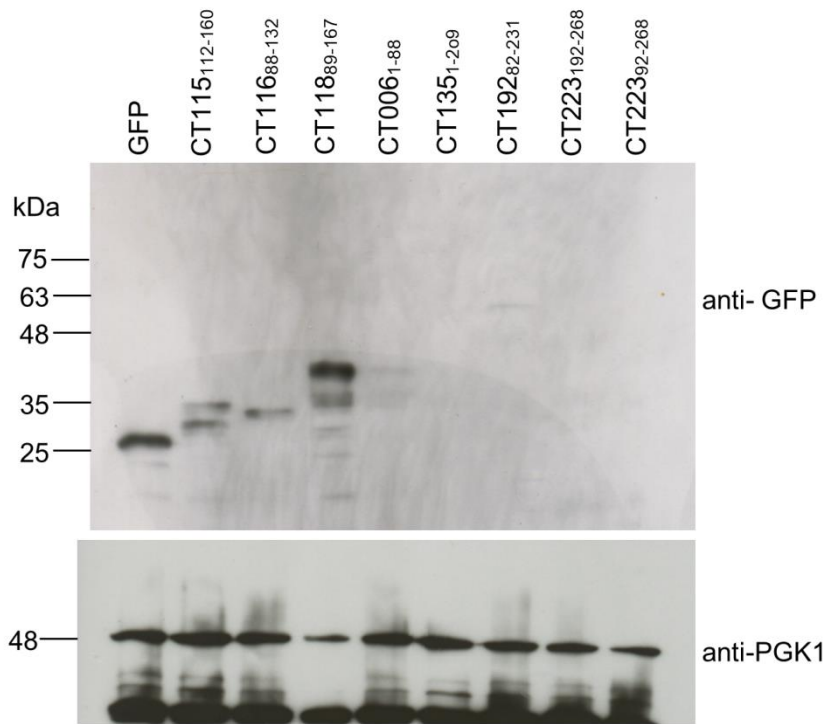

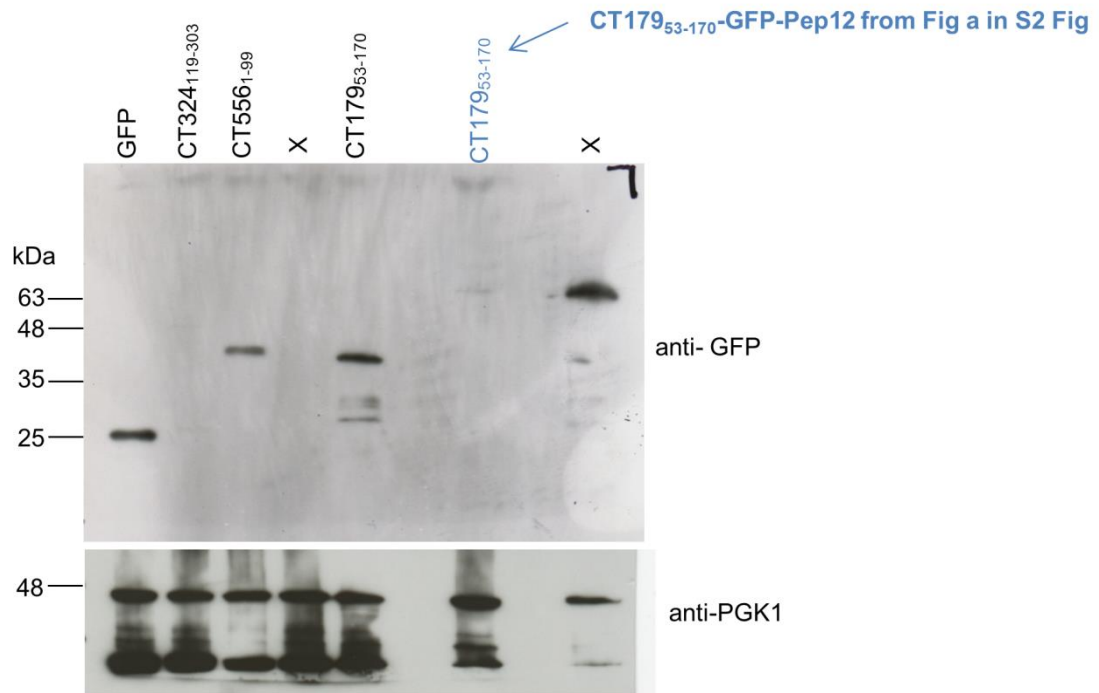

#### 4. Uncropped blot images from Fig b in S1 Fig.

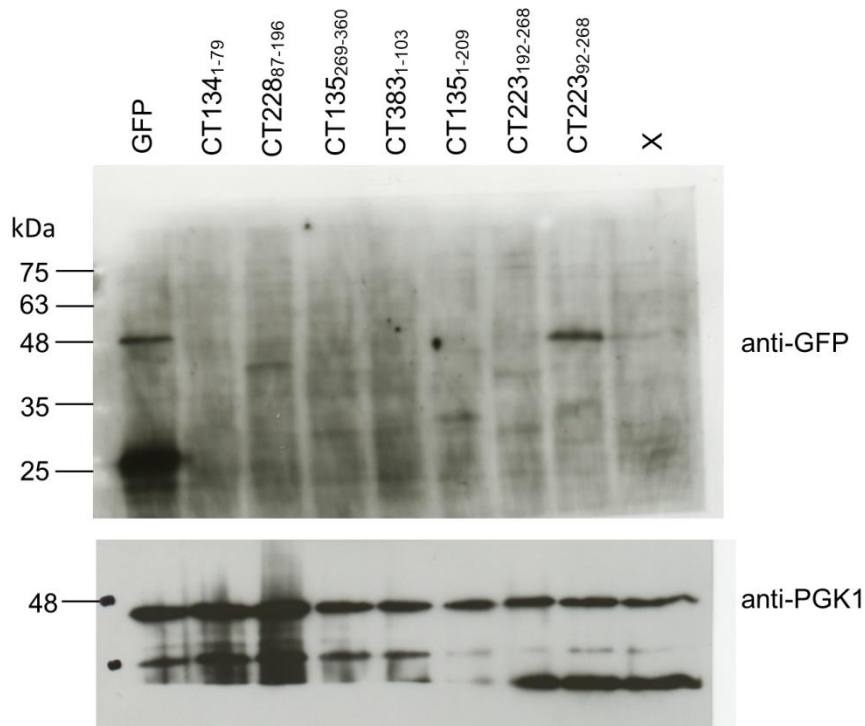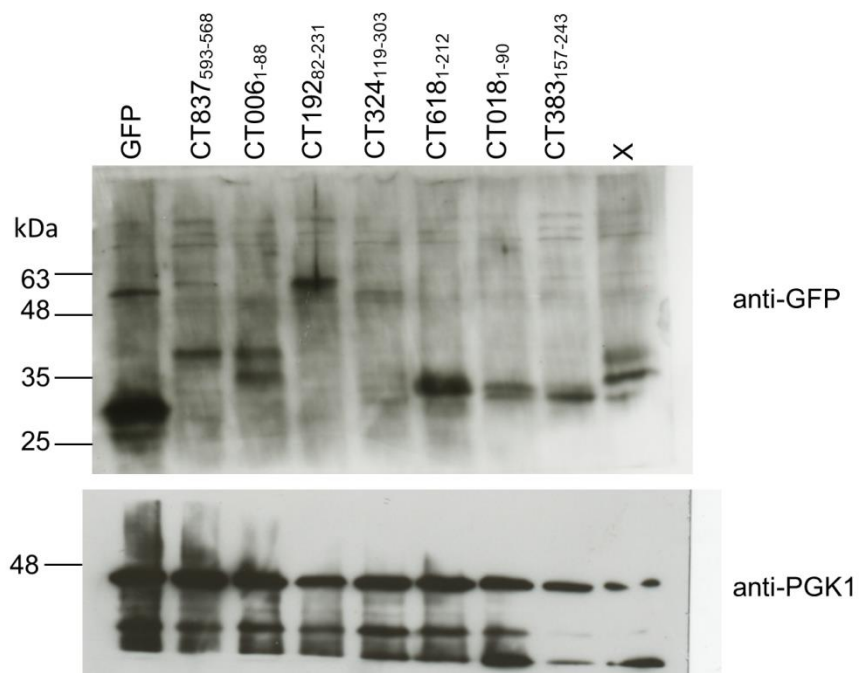

## 5. Uncropped blot images from Fig a in S2 Fig.

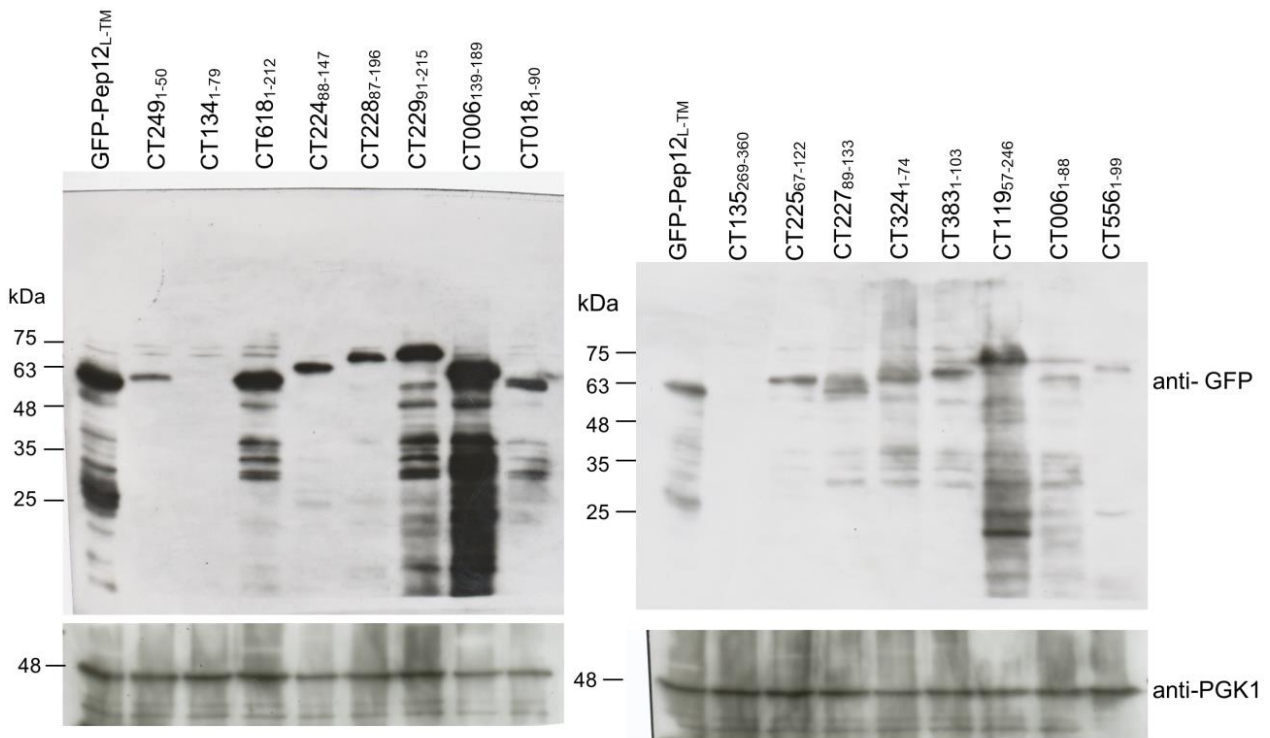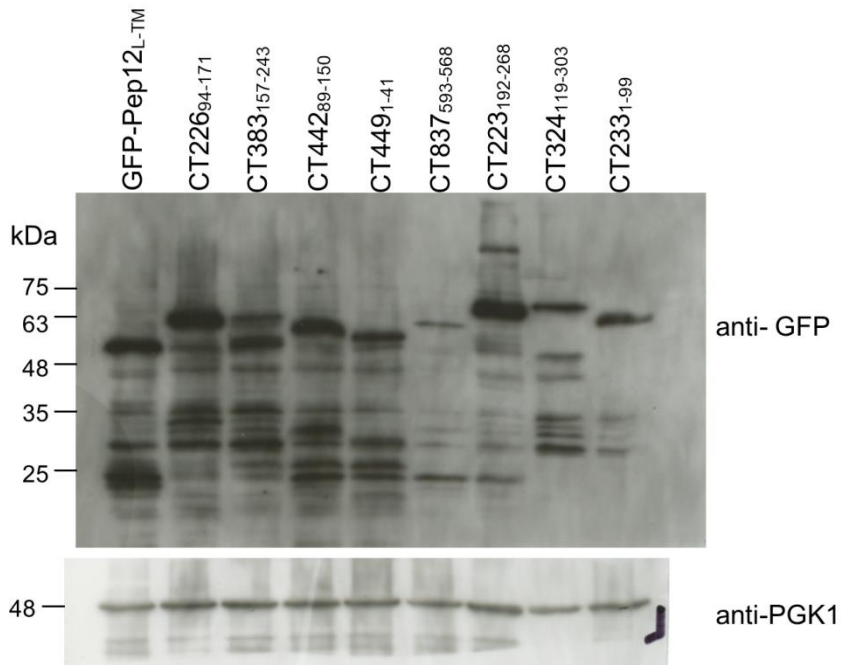

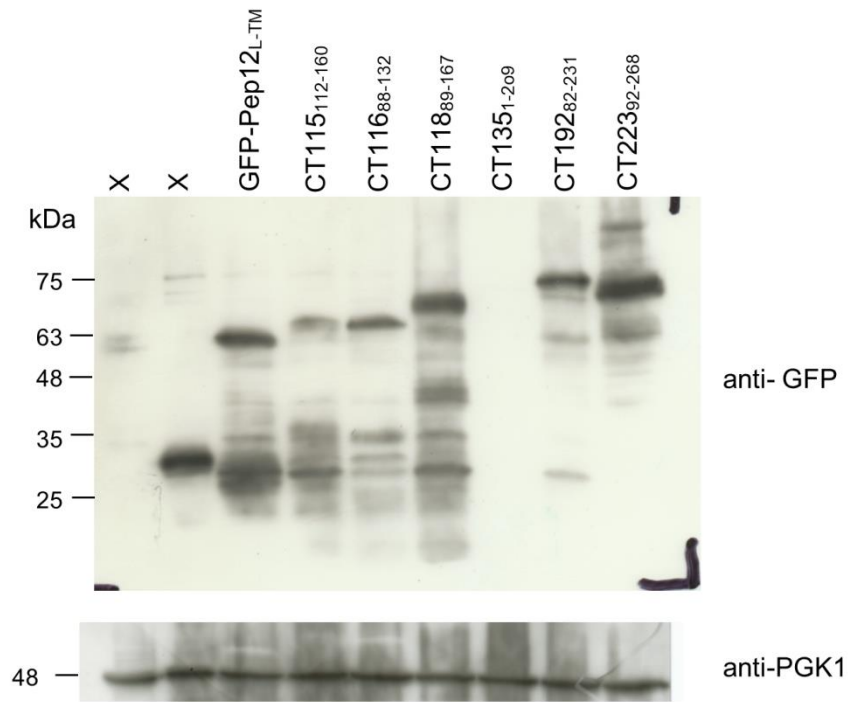

**6. Uncropped blot images from Fig b in S2 Fig.**

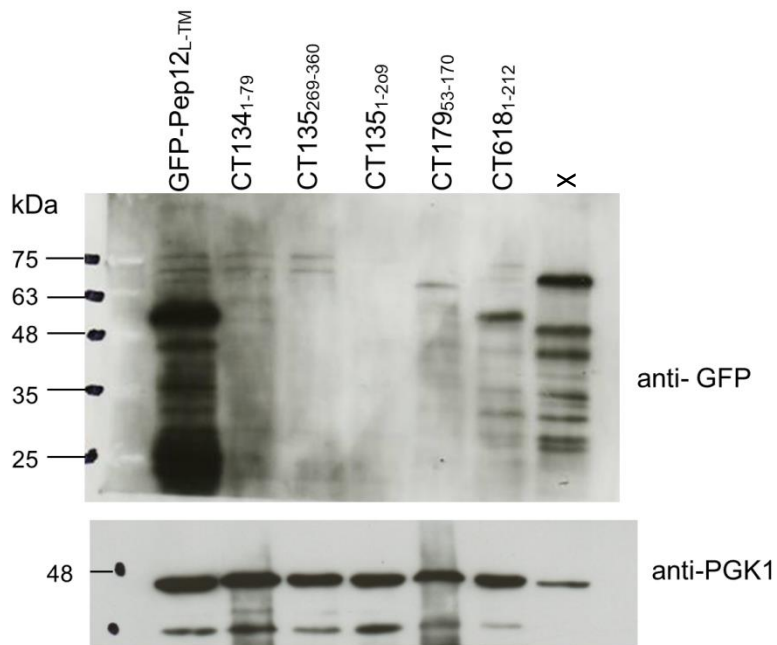



**7. Uncropped blot images from Fig b in S7 Fig**

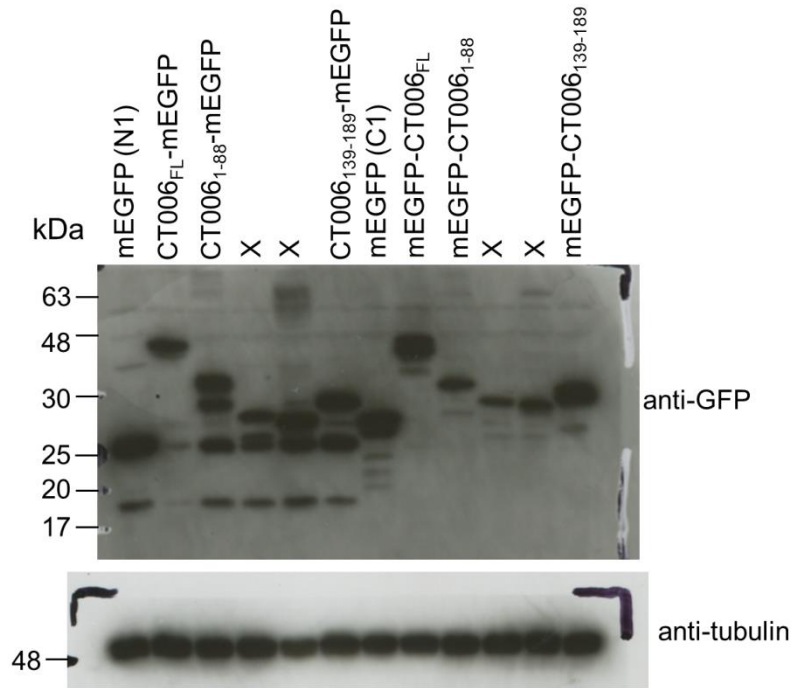

**8. Uncropped blot images from S9 Fig**

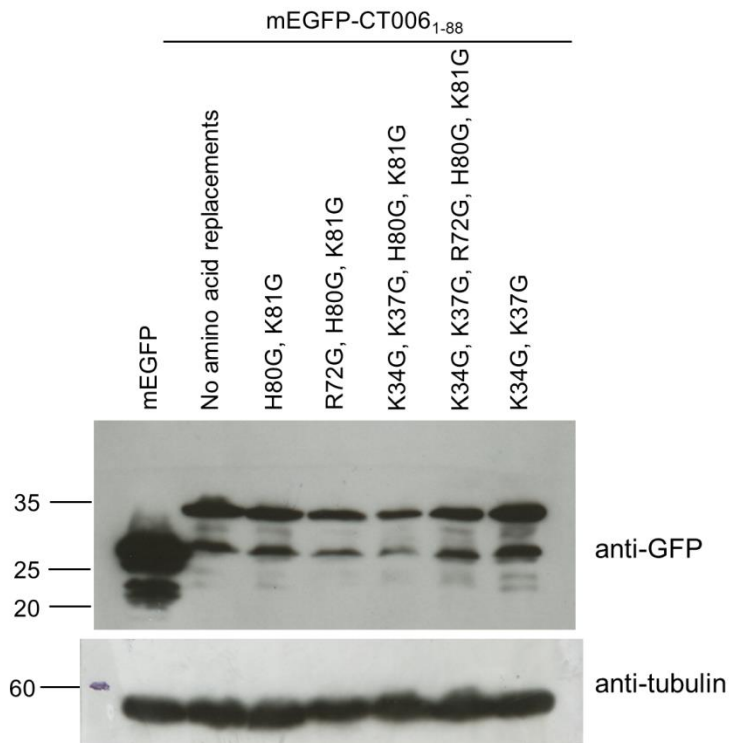

9. Uncropped blot images from Fig a in S11 Fig.

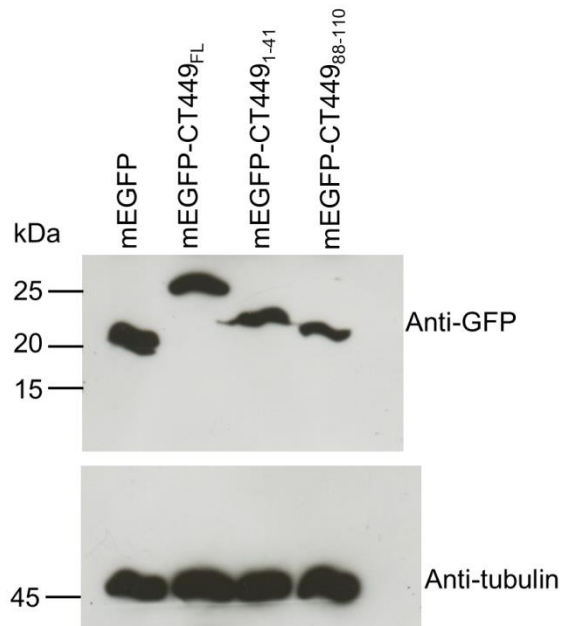

**10. Uncropped blot images from Fig a in S12 Fig.**

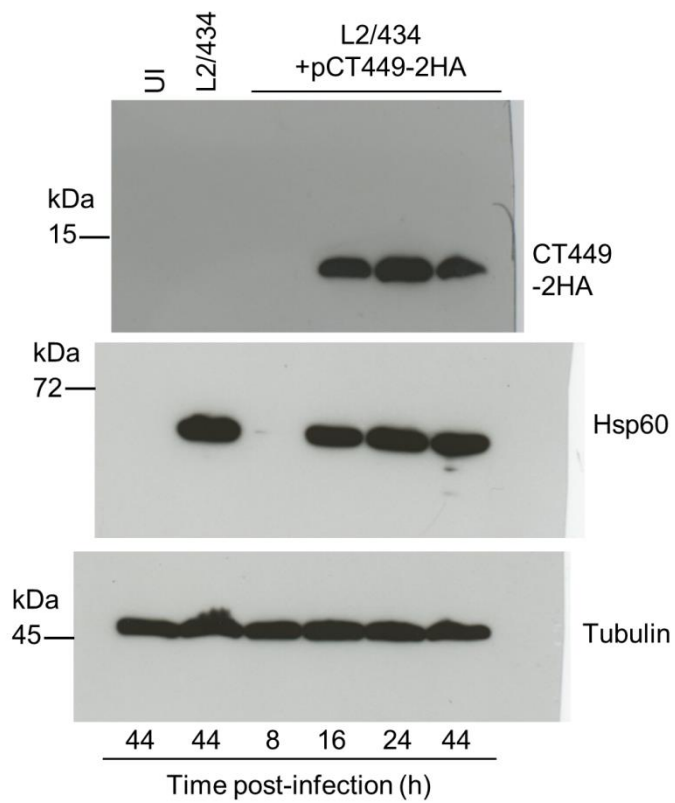

**11. Uncropped blot images from Fig b in S12 Fig.**

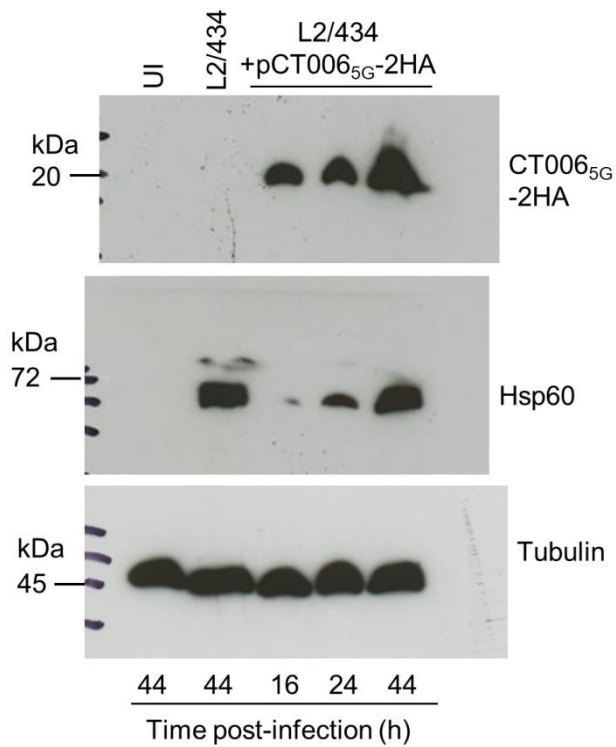

12. Uncropped blot images from Fig c in S12 Fig.

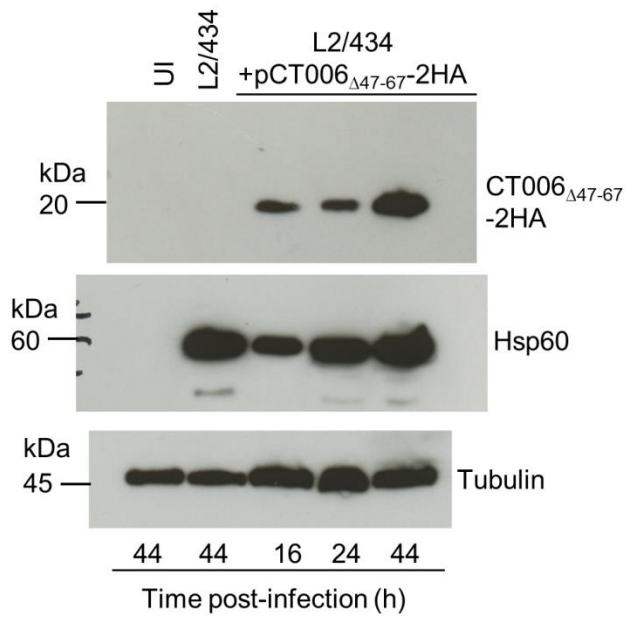

Supplement: pone.0264292.s016.pdf [file pone.0264292.s016.pdf]
