# Supplementary material for: The Chlamydia trachomatis inclusion membrane protein CT006 associates with lipid droplets in eukaryotic cells
Source: PubMed Central journal article supplement (PMC8863265; doi:10.1371/journal.pone.0264292), 2022-02-22
Supplement: pone.0264292.s001.pdf [file pone.0264292.s001.pdf]

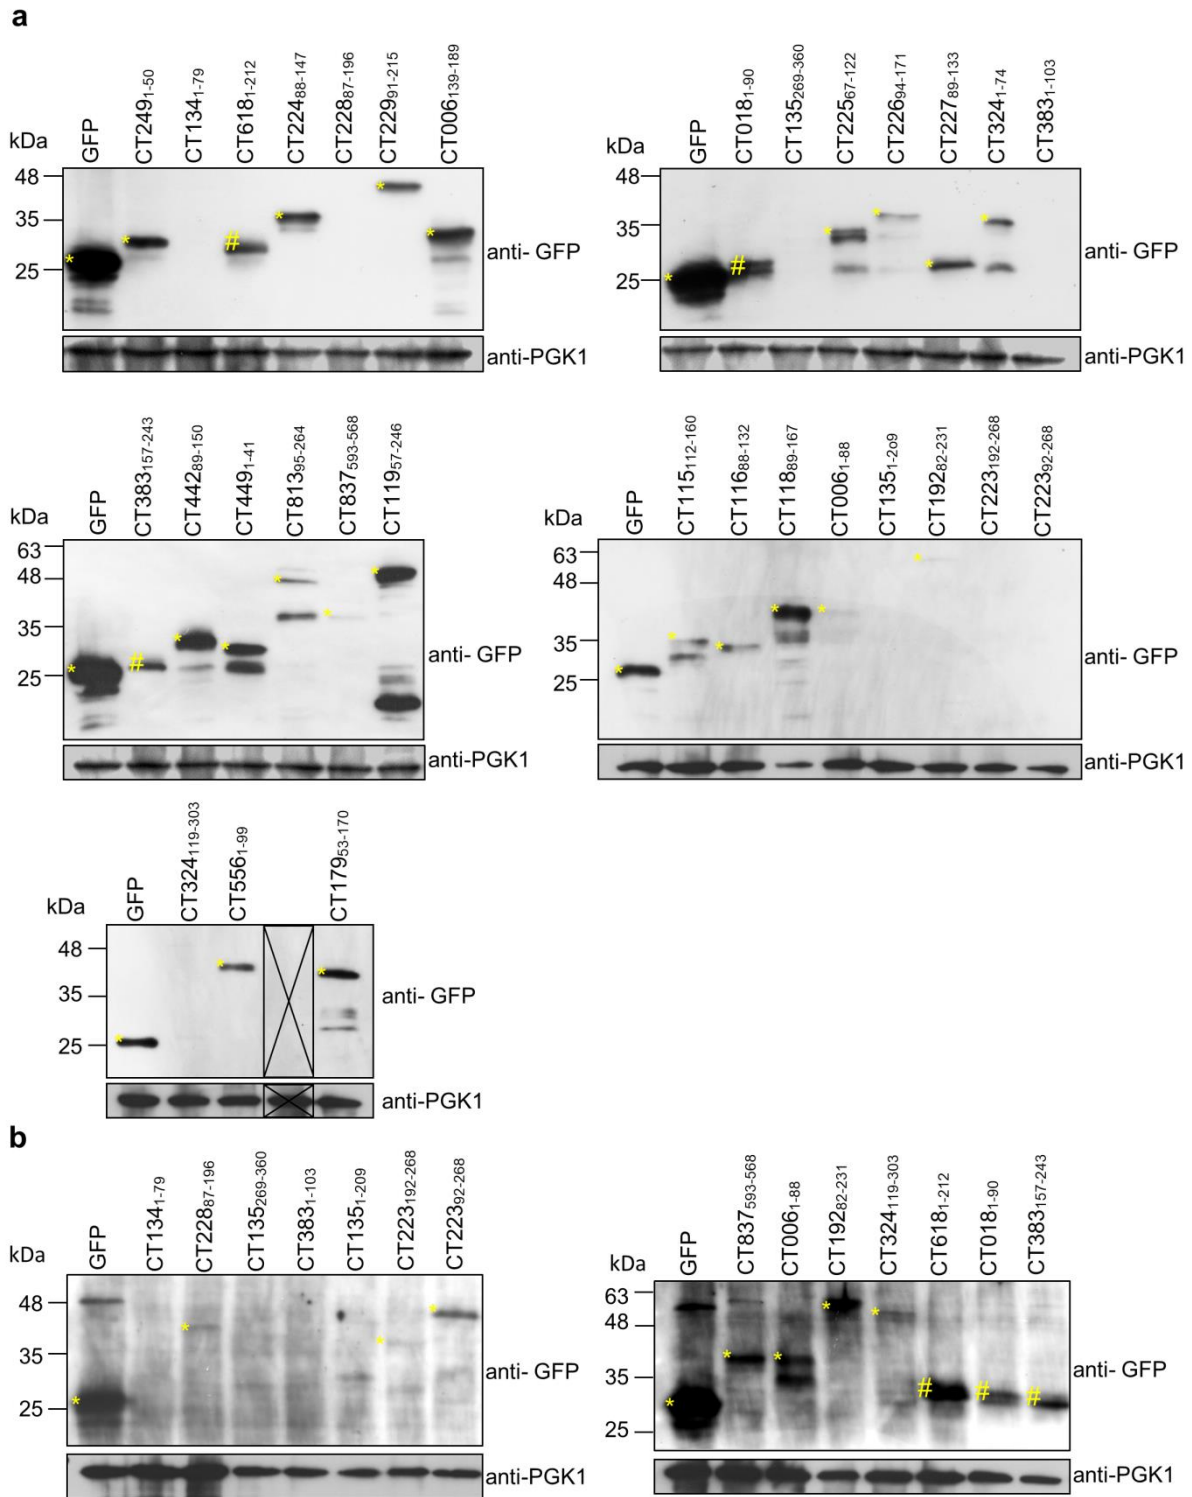

**S1 Fig. Analysis of the production of CT006-GFP fusion proteins in yeast by immunoblotting.** Whole cell extracts from *S. cerevisiae* NSY01 producing the indicated Inc fragments fused to GFP were analyzed by immunoblotting using antibodies against GFP and PGK1 (yeast loading control) and appropriate HRP-conjugated secondary antibodies. (a) Proteins were detected using SuperSignal West Pico detection kit (Thermo Fisher Scientific). (b) Proteins were detected using SuperSignal West Femto detection kit (Thermo Fisher Scientific). \* Represents proteins that migrated according to the predicted molecular mass; # represents proteins that migrated below the predicted molecular mass; the cross in (a) corresponds to a fusion protein that was not analyzed in this study.
