# Supplementary material for: The Chlamydia trachomatis inclusion membrane protein CT006 associates with lipid droplets in eukaryotic cells
Source: PubMed Central journal article supplement (PMC8863265; doi:10.1371/journal.pone.0264292), 2022-02-22
Supplement: pone.0264292.s003.pdf [file pone.0264292.s003.pdf]

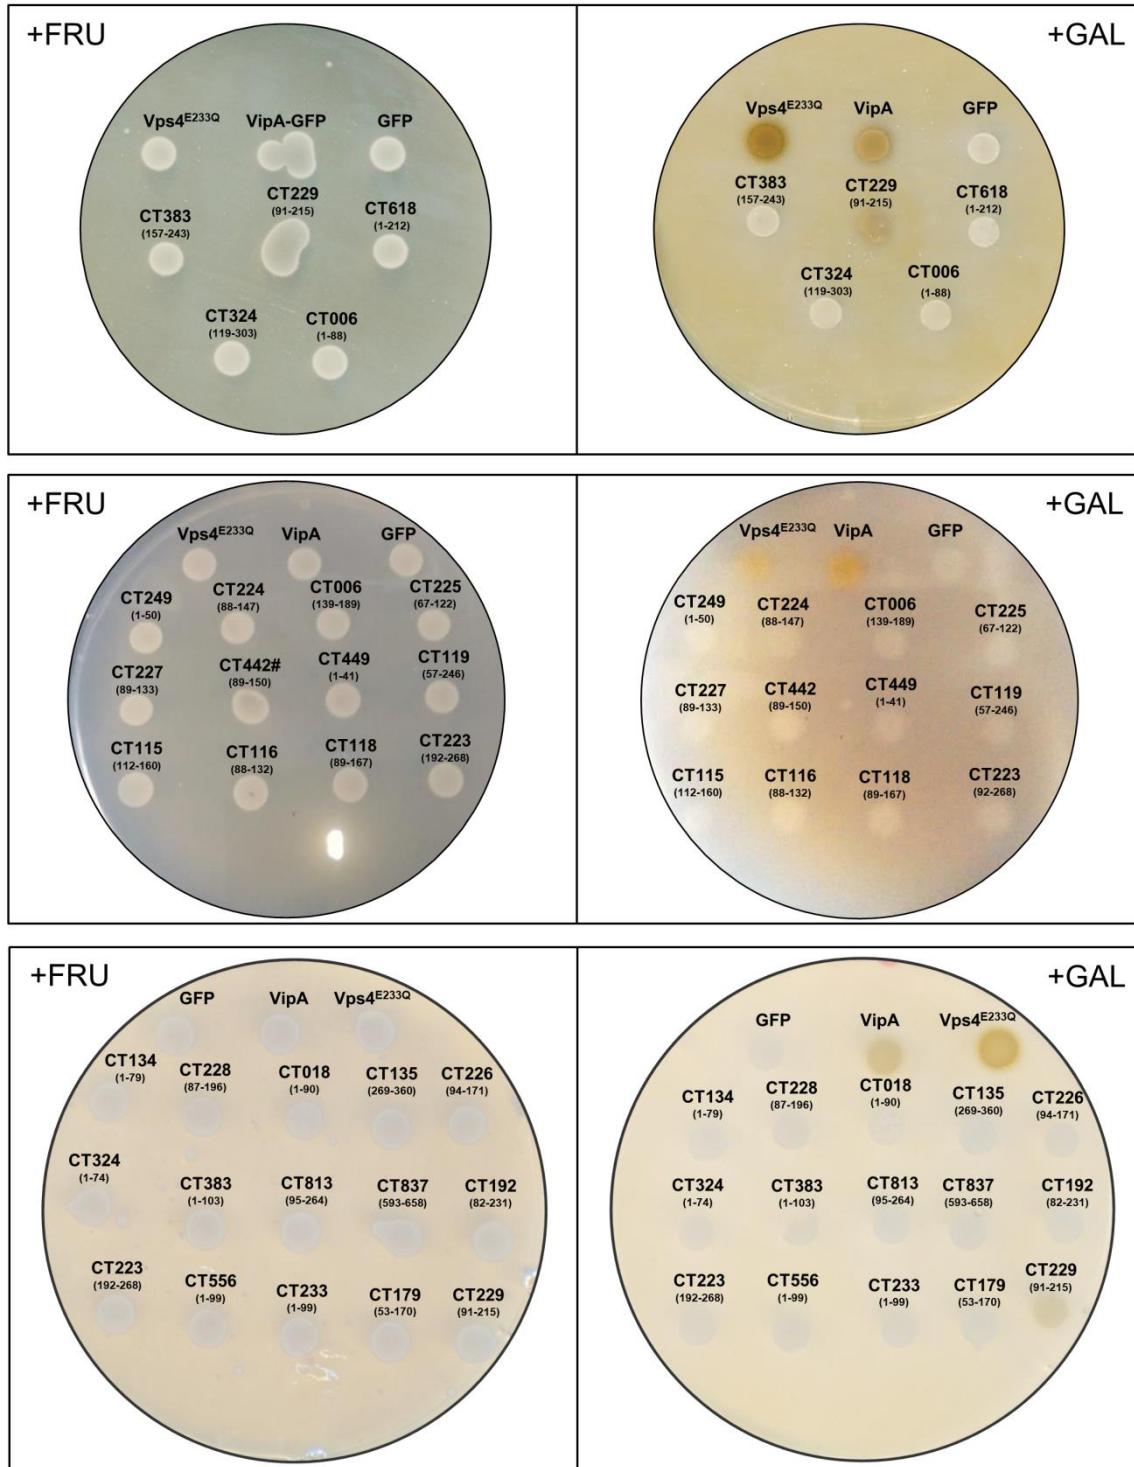

**S3 Fig. The effect of Inc-GFP proteins on vacuolar protein sorting in yeast.** *S. cerevisiae* NSY01 strains producing the indicated Inc fragments fused to GFP (Inc-GFP) were grown in solid media under inducing (galactose; +GAL) or non-inducing (fructose; +FRU) conditions. After 48 h, the Vps phenotype was analyzed qualitatively in solid media. Inc-GFP protein interfering with trafficking: CT229<sub>91-215</sub>-GFP; Negative control: GFP; Positive controls: the *Legionella pneumophila* effector VipA and the dominant-negative form of the yeast ATPase Vps4 (Vps4<sup>E233Q</sup>). Vps results with all yeast strains producing Inc-GFP proteins are summarized in S2 Table.
