# Supplementary material for: The Chlamydia trachomatis inclusion membrane protein CT006 associates with lipid droplets in eukaryotic cells
Source: PubMed Central journal article supplement (PMC8863265; doi:10.1371/journal.pone.0264292), 2022-02-22
Supplement: pone.0264292.s004.pdf [file pone.0264292.s004.pdf]

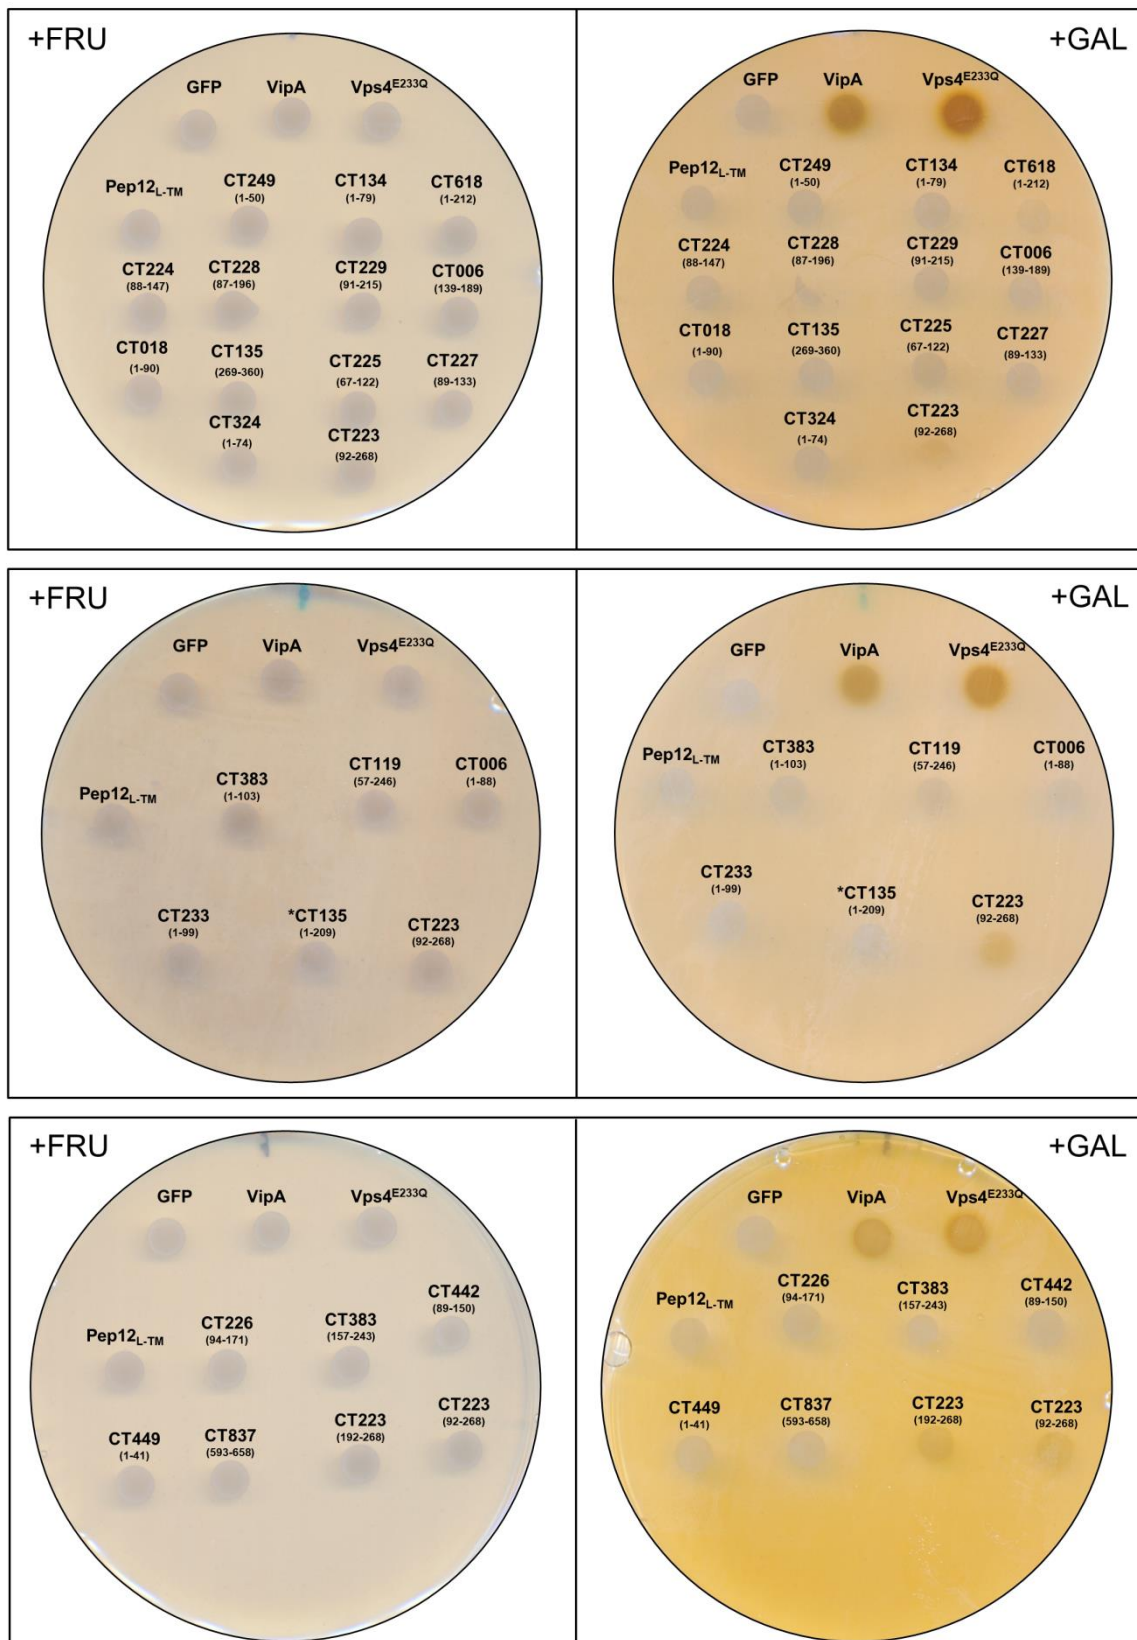

**S4 Fig. The effect of Inc-GFP-Pep12<sub>L-TM</sub> proteins on vacuolar protein sorting in yeast.** *S. cerevisiae* strains producing the indicated Inc fragments fused to GFP-Pep12<sub>L-TM</sub> (Inc-GFP-Pep12<sub>L-TM</sub>) were grown in solid media under inducing (galactose; +GAL) or non-inducing (fructose; +FRU) conditions. After 48 h, the Vps phenotype was analyzed qualitatively in solid media. Inc-GFP-Pep12<sub>L-TM</sub> protein interfering with trafficking: CT223<sub>192-268</sub>-GFP-Pep12<sub>L-TM</sub>; Negative controls: GFP and GFP-Pep12<sub>L-TM</sub>; Positive controls: the

*Legionella pneumophila* effector VipA and the dominant-negative form of the yeast ATPase Vps4 (Vps4<sup>E233Q</sup>). \*CT135<sub>1-209</sub> is fused only to GFP (\*CT135<sub>1-209</sub>-GFP). Vps results with all yeast strains producing Inc-GFP-Pep12<sub>L-TM</sub> proteins are summarized in S3 Table.
