# Supplementary material for: The Chlamydia trachomatis inclusion membrane protein CT006 associates with lipid droplets in eukaryotic cells
Source: PubMed Central journal article supplement (PMC8863265; doi:10.1371/journal.pone.0264292), 2022-02-22
Supplement: pone.0264292.s005.pdf [file pone.0264292.s005.pdf]

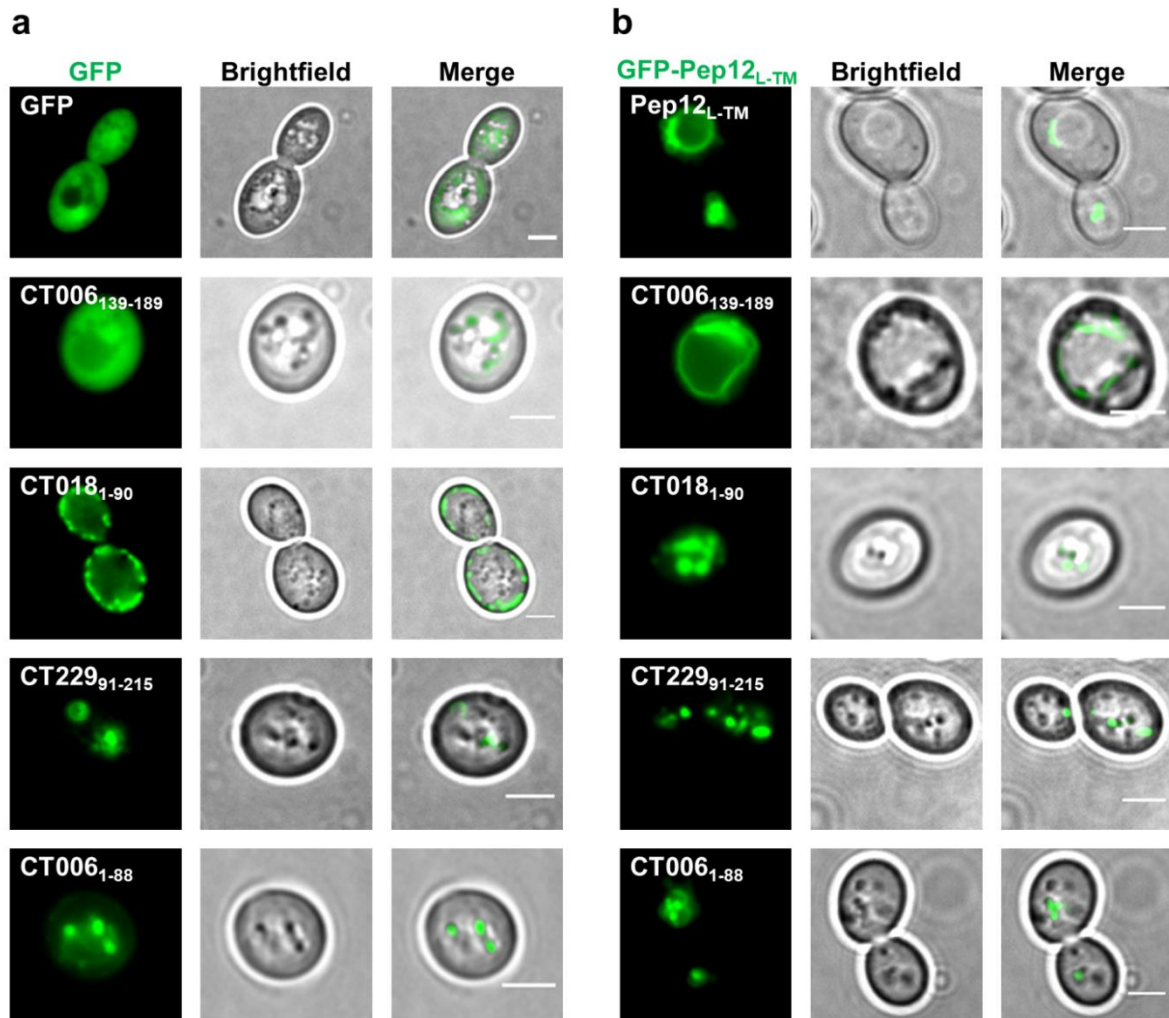

**S5 Fig. Intracellular localization of Inc-GFP and Inc-GFP-Pep12<sub>L-TM</sub> proteins in yeast.** *S. cerevisiae* strains producing the indicated Inc-GFP proteins were grown in the presence of galactose. Live cells were visualized by fluorescence microscopy. Scale bars, 5  $\mu$ m. (a) Examples for the intracellular localization of Inc-GFP proteins in yeast: cytosolic distribution (GFP and CT006<sub>139-189</sub>-GFP), mitochondria-like puncta (CT018<sub>1-90</sub>-GFP), endosomal compartments (CT229<sub>91-215</sub>-GFP) and lipid droplets (CT006<sub>1-88</sub>-GFP). (b) Examples for the intracellular localization of Inc-GFP-Pep12<sub>L-TM</sub> proteins at endosomal compartments in yeast. The intracellular localization of all Inc-GFP and Inc-GFP-Pep12<sub>L-TM</sub> fusion proteins analyzed in this study is summarized in S2 and S3 Tables.
