# Supplementary material for: The Chlamydia trachomatis inclusion membrane protein CT006 associates with lipid droplets in eukaryotic cells
Source: PubMed Central journal article supplement (PMC8863265; doi:10.1371/journal.pone.0264292), 2022-02-22
Supplement: pone.0264292.s007.pdf [file pone.0264292.s007.pdf]

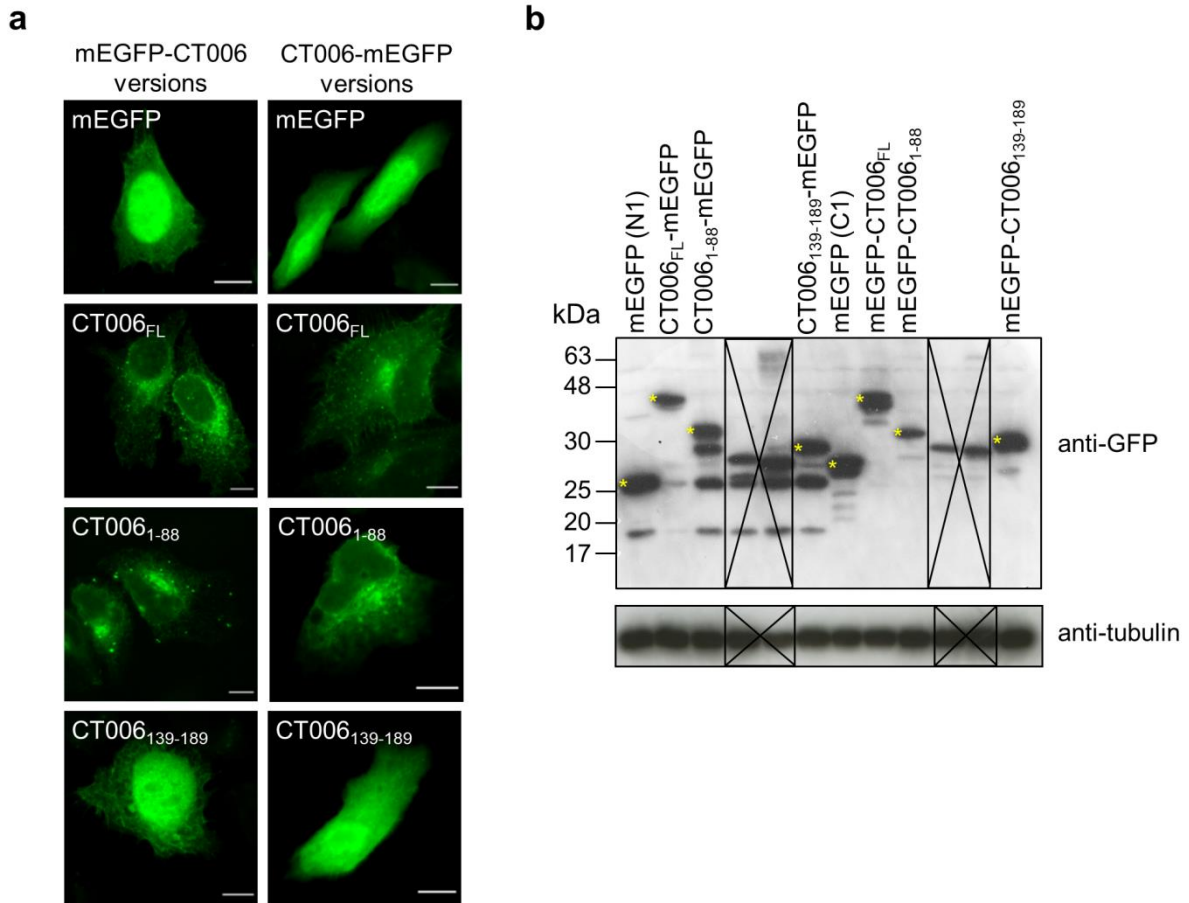

**S7 Fig. Analysis of the production and intracellular localization of CT006 versions in mammalian cells.** HeLa 229 cells were transfected for 24 h with plasmids encoding mEGFP or the indicated versions of CT006 containing a mEGFP tag at their amino-termini (mEGFP-CT006 proteins) or at their carboxy-termini (CT006-mEGFP proteins). (a) Transfected cells were fixed with 4% (w/v) PFA and imaged by fluorescence microscopy. Scale bars, 10  $\mu$ m. (b) Whole cell extracts were analyzed by immunoblotting with antibodies against GFP and  $\alpha$ -tubulin (HeLa 229 cells loading control) and appropriate HRP-conjugated secondary antibodies. Proteins were detected using SuperSignal West Pico detection kit (Thermo Fisher Scientific). The crosses in (a) correspond to proteins that were not analyzed in this study.
