# Supplementary material for: The Chlamydia trachomatis inclusion membrane protein CT006 associates with lipid droplets in eukaryotic cells
Source: PubMed Central journal article supplement (PMC8863265; doi:10.1371/journal.pone.0264292), 2022-02-22
Supplement: pone.0264292.s013.pdf [file pone.0264292.s013.pdf]

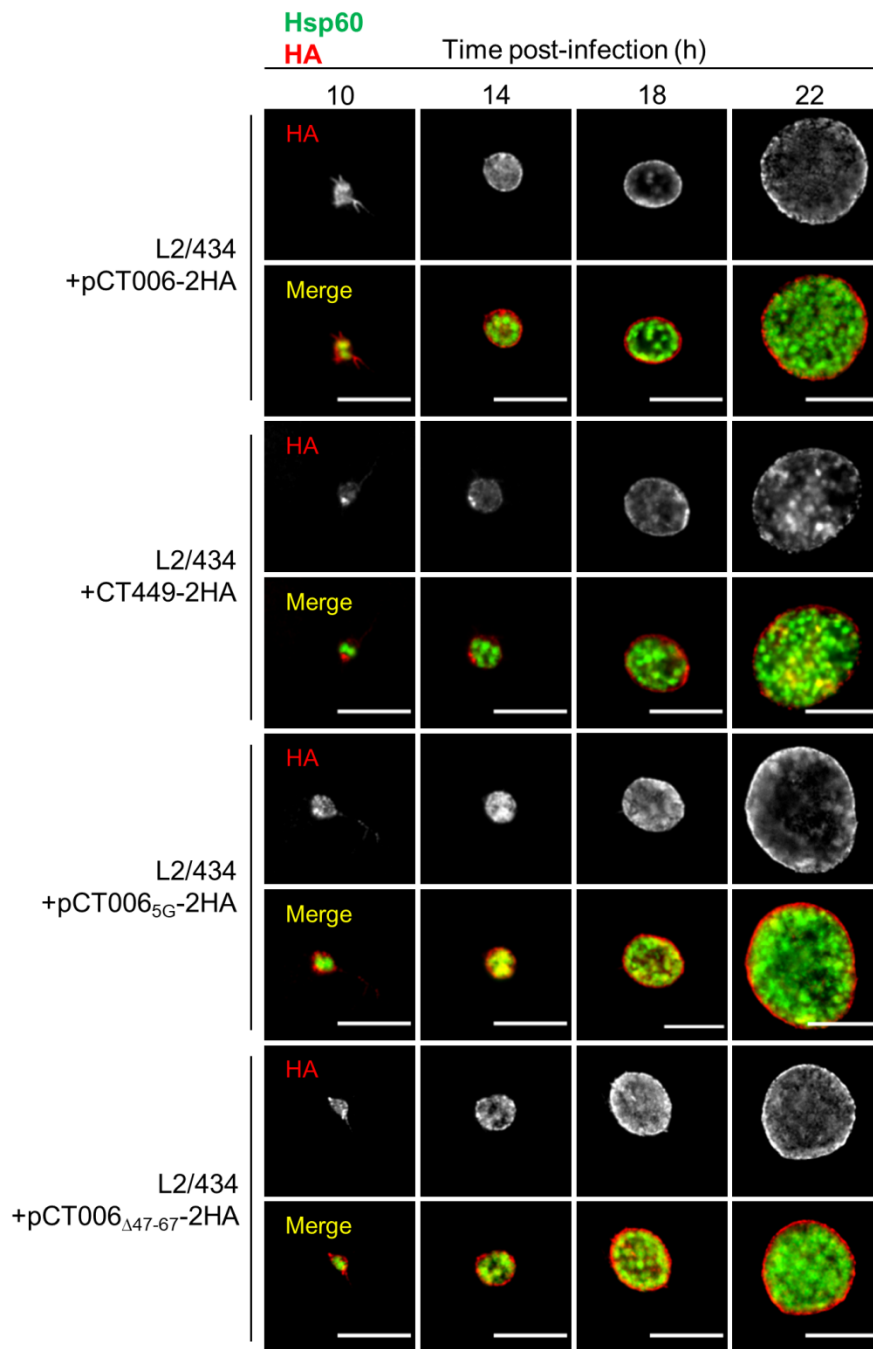

**S13 Fig. Analysis of the intracellular localization of plasmid-encoded CT006-2HA, CT449-2HA, CT006<sub>5G</sub>-2HA and CT006<sub>Δ47-67</sub>-2HA.** HeLa 229 cells were infected by L2/434 strains harboring pCT006-2HA, pCT449-2HA, pCT006<sub>5G</sub>-2HA or pCT006<sub>Δ47-67</sub>-2HA. At the indicated times post-infection, infected cells were fixed with 4% (w/v) PFA, immunolabeled with antibodies against HA (red), Hsp60 (green) and appropriate fluorophore-conjugated secondary antibodies. The labeled cells were then imaged by fluorescence microscopy. Scale bars, 10 μm.
