# Supplementary material for: The Chlamydia trachomatis inclusion membrane protein CT006 associates with lipid droplets in eukaryotic cells
Source: PubMed Central journal article supplement (PMC8863265; doi:10.1371/journal.pone.0264292), 2022-02-22
Supplement: pone.0264292.s021.pdf [file pone.0264292.s021.pdf]

**S5 Table. Oligonucleotides used in this work.**

| Number | Description                                                           | Sequence (5' - 3')                                                  | Restriction Site |
|--------|-----------------------------------------------------------------------|---------------------------------------------------------------------|------------------|
| 628    | Reverse oligo to construct pJB140, pJB141, pJB142, pJB143 and pJB144. | TTATGTTTTCAGGTTTCAGGG                                               | -                |
| 1483   | Reverse oligo to construct pSVP277 and pIP12.                         | GATCGTCGACGTCTTAGGAGCTTT<br>TTGCAATGC                               | Sall             |
| 1552   | Reverse oligo to construct pIP13.                                     | GATCGCGGCCGCGGATAGAGGAG<br>CTTTGCACACC                              | NotI             |
| 1756   | Reverse oligo to construct pIP14.                                     | GATCGCGGCCGCGCTCTTGAGTT<br>TTTTCTGCTTT CTGG                         | NotI             |
| 1803   | Forward oligo to construct pIP13 and pIP14.                           | GATCGGTACCTTAAGACCCACTTT<br>CACATTTAA                               | KpnI             |
| 1808   | Reverse overlap oligo to construct pIP14.                             | GCAACTTTTTCTCTTCTTTTCATTC<br>ACTTTTCTCTATCACTGATAGGGA<br>GTGG       | -                |
| 1809   | Forward overlap oligo to construct pIP14.                             | CCACTCCCTATCAGTGATAGAGAA<br>AAGTGAAATGAAAGAAGAGAAAAA<br>GTTGC       | -                |
| 1977   | Forward oligo to construct pJB27.                                     | AAAAGGATCCATGGGTATCAAACC<br>TCATG                                   | BamHI            |
| 1978   | Reverse oligo to construct pJB27.                                     | GGGGAAGCTTGCGAGCAACTTTT<br>GCTGC                                    | HindIII          |
| 1979   | Forward oligo to construct pJB28.                                     | AAAAGGATCCATGGCTTGTTGCGC<br>ATGTG                                   | BamHI            |
| 1980   | Reverse oligo to construct pJB28.                                     | GGGGAAGCTTTTCAGCACGGCTTT<br>CTGTG                                   | HindIII          |
| 1981   | Forward oligo to construct pJB29.                                     | AAAAGGATCCATGGCAGCAACGG<br>TACCC                                    | BamHI            |
| 1982   | Reverse oligo to construct pJB29.                                     | GGGGAAGCTTACTTGCACGAGCT<br>CTTTTAAG                                 | HindIII          |
| 1983   | Forward oligo to construct pJB30 by restriction-free cloning.         | GTCAAGGAGAAAAAACCCCGGAT<br>CCATGTCTGGCTATGGTGGAGA                   | -                |
| 1984   | Reverse oligo to construct pJB30 by restriction-free cloning.         | CAGTGAAAAGTTCTTCTCCTTTACT<br>CATAAGCTTATCATTGGGAAAAATT<br>GAGTGTAGA | -                |
| 1985   | Forward oligo to construct pJB31 by restriction-free cloning.         | GTCAAGGAGAAAAAACCCCGGAT<br>CCATGCGTCTTATGTATCGATCCT<br>C            | -                |
| 1986   | Reverse oligo to construct pJB31 by restriction-free cloning.         | CAGTGAAAAGTTCTTCTCCTTTACT<br>CATAAGCTTAGAAGCTTGGTTAGC<br>GTCTATA    | -                |
| 1987   | Forward oligo to construct pJB32 by restriction-free cloning.         | GTCAAGGAGAAAAAACCCCGGAT<br>CCATGAGAGCACGAAGTCGTC                    | -                |
| 1988   | Reverse oligo to construct pJB32 by restriction-free cloning.         | CAGTGAAAAGTTCTTCTCCTTTACT<br>CATAAGCTTTTTTTTACGACGGGA<br>TGCCT      | -                |
| 1998   | Forward oligo to construct pJB35.                                     | GATCGGATCCATGACCCACCTTTT<br>CCC                                     | BamHI            |
| 1999   | Reverse oligo to construct pJB35.                                     | GATCAAGCTTAGCGGAAAAGCGTT<br>GG                                      | HindIII          |

**S5 Table. Continued.**

| <b>Number</b> | <b>Description</b>                   | <b>Sequence (5' - 3')</b>                 | <b>Restriction Site</b> |
|---------------|--------------------------------------|-------------------------------------------|-------------------------|
| 2000          | Forward oligo to construct pLJM1076. | GATCGGATCCATGCAGCATGCC<br>ATAATG          | BamHI                   |
| 2001          | Reverse oligo to construct pLJM1076. | GATCAAGCTTTTTGTGTGCACTT<br>GTGGC          | HindIII                 |
| 2002          | Forward oligo to construct pJB33.    | GATCGGATCCATGATCTGCCAGC<br>GCAAC          | BamHI                   |
| 2003          | Reverse oligo to construct pJB33.    | GATCAAGCTTCTCTATACGCGCAT<br>CTAAAGG       | HindIII                 |
| 2004          | Forward oligo to construct pLJM1077. | GATCGGATCCATGTCTGTGATACG<br>CAATTC        | BamHI                   |
| 2005          | Reverse oligo to construct pLJM1077. | GATCAAGCTTATCCCACCCATGAA<br>ATTTAGC       | HindIII                 |
| 2006          | Forward oligo to construct pJB36.    | GATCGGATCCATGTATGGGTTTTTC<br>TTTAAAACCG   | BamHI                   |
| 2007          | Reverse oligo to construct pJB36.    | GATCAAGCTTCTCAGACTTTCTTC<br>CAATAC        | HindIII                 |
| 2008          | Forward oligo to construct pLJM1078. | GATCGGATCCATGTGTAGTCGGG<br>GATTGC         | BamHI                   |
| 2009          | Reverse oligo to construct pLJM1078. | GATCAAGCTTTGAGACACTTATAG<br>TCACATCTGC    | HindIII                 |
| 2010          | Forward oligo to construct pJB37.    | GATCGGATCCATGGTCAAAGCCG<br>CTCATC         | BamHI                   |
| 2011          | Reverse oligo to construct pJB37.    | GATCAAGCTTCTTCCAGTTTCTTTG<br>TAAAAGTCTCCG | HindIII                 |
| 2012          | Forward oligo to construct pJB40.    | GATCGGATCCATGTTCCGGATCTAT<br>CCCTTG       | BamHI                   |
| 2013          | Reverse oligo to construct pJB40.    | GATCAAGCTTGCAATGAACACGAG<br>CGC           | HindIII                 |
| 2014          | Forward oligo to construct pJB34.    | GATCGGATCCATGCGGATCTCTCA<br>AAAAGATACTC   | BamHI                   |
| 2015          | Reverse oligo to construct pJB34.    | GATCAAGCTTGTGGCCGCGCTGG<br>TTTTTC         | HindIII                 |
| 2016          | Forward oligo to construct pLJM1079. | GATCGGATCCATGGAAGGATACTG<br>TTCTCCG       | BamHI                   |
| 2017          | Reverse oligo to construct pLJM1079. | GATCAAGCTTTTGGGTCTGATCCA<br>CCAG          | HindIII                 |
| 2018          | Forward oligo to construct pJB38.    | GATCGGATCCATGAAATTACCAGA<br>AGTGAG        | BamHI                   |
| 2019          | Reverse oligo to construct pJB38.    | GATCAAGCTTTTGCACCCAATTCA<br>TTGAC         | HindIII                 |
| 2020          | Forward oligo to construct pJB41.    | GATCGGATCCATGCAAGTTGAGAA<br>ATCTCAATG     | BamHI                   |
| 2021          | Reverse oligo to construct pJB41.    | GATCAAGCTTTATCGAACCACGTC<br>TTCC          | HindIII                 |
| 2022          | Forward oligo to construct pJB42.    | GATCGGATCCATGTGGGATGAAG<br>ACAGTTTG       | BamHI                   |
| 2023          | Reverse oligo to construct pJB42.    | GATCAAGCTTAATACCTGAGAATT<br>GCCACC        | HindIII                 |

**S5 Table. Continued.**

| Number | Description                                                             | Sequence (5' - 3')                                                     | Restriction Site |
|--------|-------------------------------------------------------------------------|------------------------------------------------------------------------|------------------|
| 2024   | Forward oligo to construct pJB43.                                       | GATCGGATCCATGCTACAGAAAAC<br>CGCTAATC                                   | BamHI            |
| 2025   | Reverse oligo to construct pJB43.                                       | GATCAAGCTTGGAGCTTTTTGTAG<br>AGGG                                       | HindIII          |
| 2026   | Forward oligo to construct pJB39.                                       | GATCGGATCCATGAGAGAGCGGT<br>TGCATC                                      | BamHI            |
| 2027   | Reverse oligo to construct pJB39.                                       | GATCAAGCTTGCTCGCCCCTTTTT<br>TACTC                                      | HindIII          |
| 2028   | Forward oligo to construct pJB44.                                       | GATCGGATCCATGGATGTTCTAGA<br>GAATCATGG                                  | BamHI            |
| 2029   | Reverse oligo to construct pJB44.                                       | GATCAAGCTTTTGAGTTACTAAAT<br>CACTTGGTCTG                                | HindIII          |
| 2030   | Forward oligo to construct pJB45.                                       | GATCGGATCCATGTCAGCAGTTGT<br>TCAG                                       | BamHI            |
| 2031   | Reverse oligo to construct pJB45.                                       | GATCAAGCTTGAAGGAGCGTGATC<br>GAGAAC                                     | HindIII          |
| 2046   | Forward oligo to construct pJB55 by restriction-free cloning.           | ACTATACAAAGTCGACCGATGCCC<br>TATGTCGGAAGACGAATTTTTTGG                   | -                |
| 2047   | Reverse oligo to construct pJB55 by restriction-free cloning.           | GCTGACTGGGTTGAAGGCTCTCAT<br>TACAATTTTATAATGAGAAAATAA<br>AAAG           | -                |
| 2048   | Forward oligo to construct pJB46 and pJB81 by restriction-free cloning. | GTCAAGGAGAAAAAACCCTGGAT<br>CCATGCCCTCCACTGTTGCAC                       | -                |
| 2049   | Reverse oligo to construct pJB46 and pJB81 by restriction-free cloning. | CAGTGAAAAGTTCTTCTCCTTTACT<br>CATAAGCTTCCGGAGCAACCCTG<br>AAAG           | -                |
| 2050   | Forward oligo to construct pJB47 and pJB84 by restriction-free cloning. | GTCAAGGAGAAAAAACCCTGGAT<br>CCATGGTAAGCTTCGATTTAAATG<br>ATC             | -                |
| 2051   | Reverse oligo to construct pJB47 and pJB84 by restriction-free cloning. | CAGTGAAAAGTTCTTCTCCTTTACT<br>CATAAGCTTGTGATCATTGTTT<br>CTTAATTTTC      | -                |
| 2052   | Forward oligo to construct pJB49 and pJB82 by restriction-free cloning. | GTCAAGGAGAAAAAACCCTGGAT<br>CCATGTGTCACATCCGAAGCAG                      | -                |
| 2053   | Reverse oligo to construct pJB49 and pJB82 by restriction-free cloning. | CAGTGAAAAGTTCTTCTCCTTTACT<br>CATAAGCTTACAATCATTGGAAAC<br>TAAATCATTAATC | -                |
| 2054   | Forward oligo to construct pJB50 by restriction-free cloning.           | GTCAAGGAGAAAAAACCCTGGAT<br>CCATGGAGCACTACTCTCGTATTT<br>G               | -                |
| 2055   | Reverse oligo to construct pJB48 and pJB50 by restriction-free cloning. | CAGTGAAAAGTTCTTCTCCTTTACT<br>CATAAGCTTCACCCGAGAGCCGTA<br>ATTG          | -                |

**S5 Table. Continued.**

| Number | Description                                                             | Sequence (5' - 3')                                                | Restriction Site |
|--------|-------------------------------------------------------------------------|-------------------------------------------------------------------|------------------|
| 2056   | Forward oligo to construct pJB48 by restriction-free cloning.           | GTCAAGGAGAAAAAACCCCGGAT<br>CCATGTGTAGTTGTTGCTTGAGAT<br>C          | -                |
| 2057   | Forward oligo to construct pJB51 and pJB83 by restriction-free cloning. | GTCAAGGAGAAAAAACCCCGGAT<br>CCATGCTAGATAAAGAAAACAAAT<br>ACC        | -                |
| 2058   | Reverse oligo to construct pJB51 and pJB83 by restriction-free cloning. | CAGTGAAAAGTTCTTCTCCTTTACT<br>CATAAGCTTTTGTTCATAACTCGT<br>GTTGGAC  | -                |
| 2059   | Forward oligo to construct pJB52 and pJB85 by restriction-free cloning. | GTCAAGGAGAAAAAACCCCGGAT<br>CCATGCCATTGCAAAAAGAAGC                 | -                |
| 2060   | Reverse oligo to construct pJB52 and pJB85 by restriction-free cloning. | CAGTGAAAAGTTCTTCTCCTTTACT<br>CATAAGCTTATATTGTAGCCAGTC<br>CCTCTG   | -                |
| 2065   | Forward oligo to construct pJB86 by restriction-free cloning.           | GTCAAGGAGAAAAAACCCCGGAT<br>CCATGACGTACTCTATGTCCGATA<br>TAG        | -                |
| 2066   | Reverse oligo to construct pJB86 by restriction-free cloning.           | CAGTGAAAAGTTCTTCTCCTTTACT<br>CATAAGCTTCTGCGGGCCGAGTC<br>CTAAAG    | -                |
| 2069   | Forward oligo to construct pJB54 and pJB87 by restriction-free cloning. | GTCAAGGAGAAAAAACCCCGGAT<br>CCATGAAAGAACAAAAGCTTGCGAG<br>C         | -                |
| 2070   | Reverse oligo to construct pJB54 and PJB87 by restriction-free cloning. | CAGTGAAAAGTTCTTCTCCTTTACT<br>CATAAGCTTACCTTTGGGAGAAGT<br>ATTTGCT  | -                |
| 2132   | Forward oligo to construct pIP12.                                       | GATCGCGGCCGCAGTGGTCGCCC<br>TCGCACTACTAGTTTCG                      | NotI             |
| 2162   | Forward oligo to construct pJB71 by restriction-free cloning.           | GTCAAGGAGAAAAAACCCCGGAT<br>CCATGGAAGGATACTGTTCTCCG                | -                |
| 2163   | Reverse oligo to construct pJB71 by restriction-free cloning.           | CAGTGAAAAGTTCTTCTCCTTTACT<br>CATAAGCTTTTGGGTCTGATCCAC<br>CAGAC    | -                |
| 2164   | Forward oligo to construct pJB88 by restriction-free cloning.           | GTCAAGGAGAAAAAACCCCGGAT<br>CCATGCTACAGAAAACCGCTAATC<br>TAC        | -                |
| 2165   | Reverse oligo to construct pJB88 by restriction-free cloning.           | CAGTGAAAAGTTCTTCTCCTTTACT<br>CATAAGCTTGGAGCTTTTTGTAGA<br>GGGTGATG | -                |
| 2237   | Forward oligo to construct pJB104 and pJB105.                           | GATCCTCGAGAACCCTCCACTGTT<br>GCACC                                 | XhoI             |
| 2238   | Reverse oligo to construct pJB104 and pJB113.                           | GATCGGATCCTTAAGCGGAAAAGC<br>GTTGG                                 | BamHI            |
| 2239   | Forward oligo to construct pJB106 and pJB107.                           | GATCCTCGAGATGCCCTCCACTGT<br>TGC                                   | XhoI             |
| 2241   | Reverse oligo to construct pJB105.                                      | GATCGGATCCTTATCCGGAGCAAC<br>CCTG                                  | BamHI            |
| 2242   | Reverse oligo to construct pJB107.                                      | GATCGGATCCTCCGGAGCAACCC<br>TGAAAG                                 | BamHI            |

**S5 Table. Continued.**

| Number | Description                                                   | Sequence (5' - 3')                                                              | Restriction Site |
|--------|---------------------------------------------------------------|---------------------------------------------------------------------------------|------------------|
| 2250   | Forward oligo to construct pAV4.                              | GATCGGTACCACAATCAGCTTATC<br>TCCCTAG                                             | KpnI             |
| 2251   | Reverse oligo to construct pAV4.                              | GATCGCGGCCGCGAGCGGAAAAG<br>CGTTGGG                                              | NotI             |
| 2263   | Reverse oligo to construct pJB106 and pJB110.                 | GATCGGATCCAAAGCGGAAAAGC<br>GTTGGG                                               | BamHI            |
| 2264   | Reverse oligo to construct pJB107.                            | GATCGGATCCAATCCGGAGCAAC<br>CCTGAAAG                                             | BamHI            |
| 2271   | Forward oligo to construct pJB110.                            | GATCCTCGAGATGACCCACCTTTT<br>CCCAGC                                              | XhoI             |
| 2272   | Forward oligo to construct pJB113.                            | GATCCTCGAGAAACCCACCTTTTC<br>CCAGC                                               | XhoI             |
| 2616   | Forward oligo to construct pJB134.                            | GATCGGTACCATAGATAATGATTA<br>TTATCAAG                                            | KpnI             |
| 2617   | Reverse oligo to construct pJB134.                            | GATCGCGGCCGCGCTGAATAGGC<br>GCTTCAG                                              | NotI             |
| 2635   | Forward overlap oligo to construct pJB142, pJB143 and pJB144. | CCTCTAGCTCAAGGATACCCTGGA<br>GCAGCATTATCCATAG                                    | -                |
| 2636   | Reverse overlap oligo to construct pJB142, pJB143 and pJB144. | CTATGGATAATGCTGCTCCAGGGT<br>ATCCTTGAGCTAGAGG                                    | -                |
| 2637   | Forward overlap oligo to construct pJB141.                    | GTATTTCTATCGGAGGTCTGATC<br>TCCTGC                                               | -                |
| 2638   | Reverse overlap oligo to construct pJB141.                    | GCAGGAGATCAGACCTCCGATAG<br>GAAATAC                                              | -                |
| 2639   | Forward overlap oligo to construct pJB140 .                   | GATCTCCTGCCTATTCGGTGGAAG<br>CTTTCAGGGTTGC                                       | -                |
| 2640   | Reverse overlap oligo to construct pJB140.                    | GCAACCCTGAAAGCTTCCACCGAA<br>TAGGCAGGAGATC                                       | -                |
| 2662   | Forward overlap oligo to construct pJB151.                    | CATAACACCTAGTTGGAAAAATGC<br>CCTCCACTGTTGCACC                                    | -                |
| 2663   | Reverse overlap oligo to construct pJB151.                    | GGTGCAACAGTGGAGGGCATTTTT<br>CCAACCTAGGTGTTATG                                   | -                |
| 2664   | Forward overlap oligo to construct pJB151.                    | GCTTTCAGGGTTGCTCCGGATATG<br>TTCTAGCAACCTTTC                                     | -                |
| 2665   | Reverse overlap oligo to construct pJB151.                    | GAAAGGTTGCTAGAACATATCCGG<br>AGCAACCCTGAAAGC                                     | -                |
| 2778   | Forward oligo to construct pJB167.                            | GATCGCGGCCGCGGATGACATGT<br>GATTCGCG                                             | NotI             |
| 2779   | Reverse oligo to construct pJB168 and pJB169.                 | GATCGCGGCCGCGTTAAGCGGAA<br>AAGCGTTGGGAAGG                                       | NotI             |
| 2780   | Forward overlap oligo to construct pJB168.                    | GAAAGAGTTGCCGCTGCCAGTGG<br>TCGCCCTCGCACTACTAGTTTCGC<br>TGAAAGTTACATGAGCCCTCTAGC | -                |
| 2781   | Reverse overlap oligo to construct pJB168.                    | GCTAGAGGGCTCATGTAACCTTCA<br>GCGAACTAGTAGTGCAGGGGCG<br>ACCACTGGCAGCGGCAACTCTTTC  | -                |
| 2782   | Forward overlap oligo to construct pJB169.                    | CCCTAAAGCAGCAAGTGGTCGCC<br>CTCGCACTACTAGTTTCGCTGAAA<br>GTTTATCCATAGCCTCTTTAG    | -                |

**S5 Table. Continued.**

| <b>Number</b> | <b>Description</b>                         | <b>Sequence (5' - 3')</b>                                                    | <b>Restriction Site</b> |
|---------------|--------------------------------------------|------------------------------------------------------------------------------|-------------------------|
| 2783          | Reverse overlap oligo to construct pJB169. | CTAAAGAGGCTATGGATAAACTTT<br>CAGCGAAACTAGTAGTGCGAGGG<br>CGACCACTTGCTGCTTTAGGG | -                       |
| 2787          | Forward overlap oligo to construct pJB170. | CCATAGCCTCTTTAGCAGTATTTTC<br>CTATCAGAGG                                      | -                       |
| 2788          | Reverse overlap oligo to construct pJB170. | CCTCTGATAGGAAATACTGCTAAA<br>GAGGCTATGG                                       | -                       |
